# Supplementary material for: Lone-pair–π interactions: analysis of the physical origin and biological implications
Source: Royal Society of Chemistry journal article supplement (doi:10.1039/c6cp01524g), 2016-01-01
Supplement: c6cp01524g1.pdf [file c6cp01524g1.pdf]

# Lone-pair– $\pi$ interactions: analysis of the physical origin and biological implications

Jan Novotný,<sup>1,‡</sup> Sophia Bazzi,<sup>1,2,3,||,‡</sup> Radek Marek,<sup>1,3</sup> and Jiří Kozelka<sup>\*2,4</sup>

<sup>1</sup> CEITEC – Central European Institute of Technology, Masaryk University, Kamenice 5/A4,  
CZ-625 00 Brno, Czech Republic

<sup>2</sup> Department of Condensed Matter Physics, Faculty of Science, Masaryk University, Kotlářská 2,  
CZ-611 37 Brno, Czech Republic

<sup>3</sup> National Center for Biomolecular Research, Faculty of Science, Masaryk University, Kamenice 5/A4,  
CZ-625 00 Brno, Czech Republic

<sup>4</sup> Université Paris Descartes, UMR 8601 CNRS, 45, rue des Saints-Pères, 75270 Paris, France,  
E-mail: [kozelka.jiri@gmail.com](mailto:kozelka.jiri@gmail.com)

<sup>||</sup> Present address: Center for Free-Electron Laser Science, DESY, Notkestraße 85, Hamburg, Germany

<sup>‡</sup> These authors contributed equally.

## Electronic Supplementary Information

**Fig. S1:** Electrostatic (ES) and Orbital (ORB) components of the Cl<sup>-</sup>-TCB complex in the asymmetric chloride approach along the normale to the TCB ring through the N-atom (“off-center”) and in the symmetrical approach along the C<sub>2</sub> axis towards the ring centroid (“sym”). EDA-DFT decomposition analysis using the ADF 16 program, M06-2X exchange-correlation functional, TZP2P basis set, scans without geometry relaxation. The arrows indicate the calculated equilibrium distances

**Table S1:** EDA-DFT energy decomposition analysis of the symmetrical Cl<sup>-</sup>-TCB complex. Conditions as in Fig. S1, but including geometry relaxation

**Table S2:** PDB coordinate files of the analyzed complexes

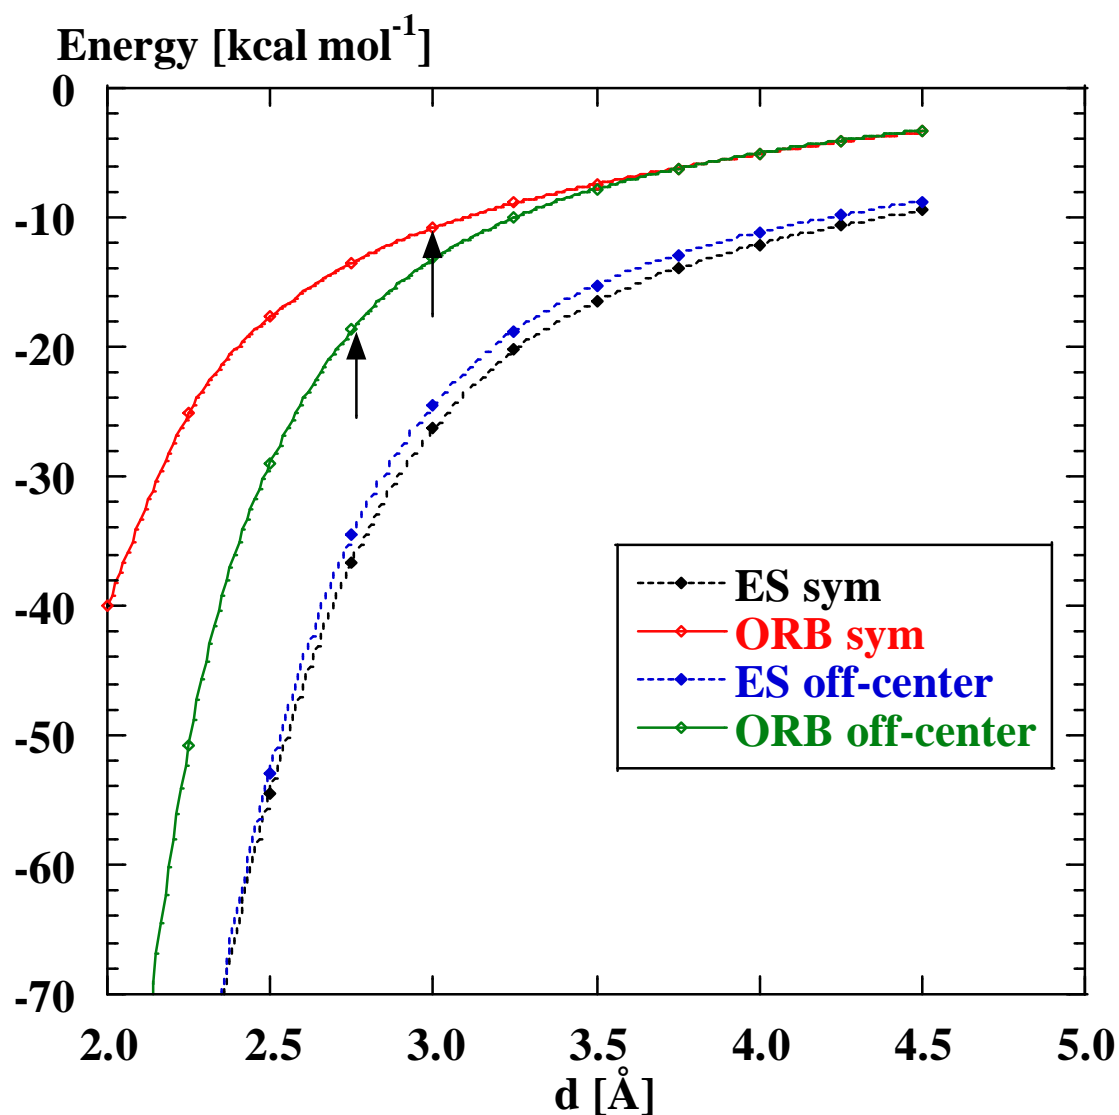

**Fig. S1:** Electrostatic (ES) and Orbital energy (ORB) components of the Cl<sup>-</sup>-TCB complex in the asymmetric chloride approach along the normale to the TCB ring through the C(H) atom (“off-center”) and in the symmetrical approach along the C<sub>2</sub> axis towards the ring centroid (“sym”), as a function of distance from the ring plane. EDA-DFT decomposition analysis using the ADF 16 program, M06-2X exchange-correlation functional, TZP2P basis set, scans without geometry relaxation. The arrows indicate the calculated equilibrium distances

**Table S1:** Energy decomposition analysis of Cl<sup>-</sup>-TCB complex in the asymmetric chloride approach along the normale to the TCB ring through the C(H)-atom (“TCB-C(H)”, entries from Table 1), and in the symmetrical approach along the C<sub>2</sub> axis towards the ring centroid (“TCB-M”). EDA-DFT decomposition analysis using the ADF 16 program, M06-2X exchange-correlation functional, TZP2P basis set.

|            | lp-donor →                                  | Cl <sup>-</sup> |                    |
|------------|---------------------------------------------|-----------------|--------------------|
| Method ↓   | arene →                                     | TCB-M<br>lp...π | TCB-C(H)<br>lp...π |
|            | <b>DI</b>                                   | <b>0.220</b>    |                    |
| <b>EDA</b> | <b>ES</b>                                   | <b>-23.7</b>    | <b>-33.8</b>       |
|            | <b>PAULI</b>                                | <b>5.9</b>      | <b>23.0</b>        |
|            | <b>ORB</b>                                  | <b>-9.7</b>     | <b>-18.0</b>       |
|            | <b>TOT<sup>c</sup></b>                      | <b>-27.6</b>    | <b>-28.8</b>       |
|            | <b>d<sub>x-y</sub> [Å]<sup>a</sup></b>      | <b>3.00</b>     | <b>2.78</b>        |
|            | <b>d<sub>x-y</sub>(vdW) [Å]<sup>b</sup></b> | <b>-</b>        | <b>3.45</b>        |

<sup>a</sup> closest atom-atom or atom-centroid distance between the fragments

<sup>b</sup> van der Waals radii taken from Bondi,<sup>1</sup> correction for H from Rowland and Taylor<sup>2</sup>

<sup>c</sup> Total interaction energy between fragments relaxed in the complex

<sup>1</sup> A. Bondi, *J. Chem. Phys.*, 1964, **68**, 441.

<sup>2</sup> R. S. Rowland and R. Taylor, *J. Phys. Chem.*, 1996, **100**, 7384.

**Table S1:** PDB coordinate files of the analyzed complexes

| COMPND | Indole-N-water (1p- $\pi$ )    |   |     |   |        |        |        |      |      |   |
|--------|--------------------------------|---|-----|---|--------|--------|--------|------|------|---|
| AUTHOR | GENERATED BY OPEN BABEL 2.3.90 |   |     |   |        |        |        |      |      |   |
| HETATM | 1                              | N | LIG | 1 | -1.271 | 1.200  | 0.060  | 1.00 | 0.00 | N |
| HETATM | 2                              | C | LIG | 1 | -0.955 | -0.137 | -1.736 | 1.00 | 0.00 | C |
| HETATM | 3                              | C | LIG | 1 | 2.457  | -0.601 | -0.068 | 1.00 | 0.00 | C |
| HETATM | 4                              | C | LIG | 1 | 0.968  | 0.874  | 1.195  | 1.00 | 0.00 | C |
| HETATM | 5                              | C | LIG | 1 | -1.860 | 0.669  | -1.081 | 1.00 | 0.00 | C |
| HETATM | 6                              | C | LIG | 1 | 0.249  | -0.155 | -0.944 | 1.00 | 0.00 | C |
| HETATM | 7                              | C | LIG | 1 | 1.500  | -0.791 | -1.064 | 1.00 | 0.00 | C |
| HETATM | 8                              | C | LIG | 1 | 2.192  | 0.219  | 1.053  | 1.00 | 0.00 | C |
| HETATM | 9                              | C | LIG | 1 | 0.010  | 0.686  | 0.191  | 1.00 | 0.00 | C |
| HETATM | 10                             | H | LIG | 1 | -2.879 | 0.927  | -1.340 | 1.00 | 0.00 | H |
| HETATM | 11                             | H | LIG | 1 | -1.790 | 1.626  | 0.815  | 1.00 | 0.00 | H |
| HETATM | 12                             | H | LIG | 1 | 0.767  | 1.510  | 2.055  | 1.00 | 0.00 | H |
| HETATM | 13                             | H | LIG | 1 | 2.958  | 0.346  | 1.815  | 1.00 | 0.00 | H |
| HETATM | 14                             | H | LIG | 1 | 3.424  | -1.091 | -0.150 | 1.00 | 0.00 | H |
| HETATM | 15                             | H | LIG | 1 | 1.715  | -1.426 | -1.922 | 1.00 | 0.00 | H |
| HETATM | 16                             | H | LIG | 1 | -1.123 | -0.650 | -2.674 | 1.00 | 0.00 | H |
| HETATM | 17                             | O | HOH | 2 | -2.297 | -1.287 | 1.639  | 1.00 | 0.00 | O |
| HETATM | 18                             | H | HOH | 2 | -2.622 | -1.975 | 1.036  | 1.00 | 0.00 | H |
| HETATM | 19                             | H | HOH | 2 | -1.573 | -1.721 | 2.118  | 1.00 | 0.00 | H |

| COMPND | Indole-N-water (OH- $\pi$ )   |   |     |   |        |        |        |      |      |   |
|--------|-------------------------------|---|-----|---|--------|--------|--------|------|------|---|
| AUTHOR | GENERATED BY OPEN BABEL 2.2.3 |   |     |   |        |        |        |      |      |   |
| HETATM | 1                             | N | LIG | 1 | -1.305 | -0.048 | -1.127 | 1.00 | 0.00 | N |
| HETATM | 2                             | C | LIG | 1 | -0.979 | 1.674  | 0.299  | 1.00 | 0.00 | C |
| HETATM | 3                             | C | LIG | 1 | 2.483  | 0.068  | 0.544  | 1.00 | 0.00 | C |
| HETATM | 4                             | C | LIG | 1 | 0.992  | -1.114 | -0.995 | 1.00 | 0.00 | C |
| HETATM | 5                             | C | LIG | 1 | -1.894 | 1.069  | -0.532 | 1.00 | 0.00 | C |
| HETATM | 6                             | C | LIG | 1 | 0.240  | 0.909  | 0.231  | 1.00 | 0.00 | C |
| HETATM | 7                             | C | LIG | 1 | 1.503  | 1.010  | 0.849  | 1.00 | 0.00 | C |
| HETATM | 8                             | C | LIG | 1 | 2.231  | -0.982 | -0.368 | 1.00 | 0.00 | C |
| HETATM | 9                             | C | LIG | 1 | 0.011  | -0.163 | -0.690 | 1.00 | 0.00 | C |
| HETATM | 10                            | H | LIG | 1 | -2.921 | 1.327  | -0.751 | 1.00 | 0.00 | H |
| HETATM | 11                            | H | LIG | 1 | -1.741 | -0.630 | -1.829 | 1.00 | 0.00 | H |
| HETATM | 12                            | H | LIG | 1 | 0.797  | -1.927 | -1.692 | 1.00 | 0.00 | H |
| HETATM | 13                            | H | LIG | 1 | 3.017  | -1.702 | -0.583 | 1.00 | 0.00 | H |
| HETATM | 14                            | H | LIG | 1 | 3.461  | 0.138  | 1.015  | 1.00 | 0.00 | H |
| HETATM | 15                            | H | LIG | 1 | 1.707  | 1.815  | 1.553  | 1.00 | 0.00 | H |
| HETATM | 16                            | H | LIG | 1 | -1.161 | 2.552  | 0.906  | 1.00 | 0.00 | H |
| HETATM | 17                            | O | HOH | 2 | -2.295 | -1.935 | 1.307  | 1.00 | 0.00 | O |
| HETATM | 18                            | H | HOH | 2 | -1.924 | -1.268 | 0.704  | 1.00 | 0.00 | H |
| HETATM | 19                            | H | HOH | 2 | -1.620 | -2.018 | 2.000  | 1.00 | 0.00 | H |

| COMPND | Indole-NH-water(N-H- $\pi$ )  |   |     |   |        |        |        |      |      |   |
|--------|-------------------------------|---|-----|---|--------|--------|--------|------|------|---|
| AUTHOR | GENERATED BY OPEN BABEL 2.2.3 |   |     |   |        |        |        |      |      |   |
| HETATM | 1                             | N | LIG | 1 | -1.318 | 0.219  | -0.170 | 1.00 | 0.00 | N |
| HETATM | 2                             | C | LIG | 1 | -0.229 | 2.173  | 0.195  | 1.00 | 0.00 | C |
| HETATM | 3                             | C | LIG | 1 | 2.790  | -0.177 | 0.224  | 1.00 | 0.00 | C |
| HETATM | 4                             | C | LIG | 1 | 0.668  | -1.349 | -0.106 | 1.00 | 0.00 | C |
| HETATM | 5                             | C | LIG | 1 | -1.465 | 1.590  | 0.018  | 1.00 | 0.00 | C |
| HETATM | 6                             | C | LIG | 1 | 0.748  | 1.115  | 0.161  | 1.00 | 0.00 | C |
| HETATM | 7                             | C | LIG | 1 | 2.151  | 1.060  | 0.288  | 1.00 | 0.00 | C |

|        |    |   |     |   |        |        |        |      |      |   |
|--------|----|---|-----|---|--------|--------|--------|------|------|---|
| HETATM | 8  | C | LIG | 1 | 2.056  | -1.371 | 0.034  | 1.00 | 0.00 | C |
| HETATM | 9  | C | LIG | 1 | 0.026  | -0.105 | -0.043 | 1.00 | 0.00 | C |
| HETATM | 10 | H | LIG | 1 | -2.449 | 2.040  | -0.011 | 1.00 | 0.00 | H |
| HETATM | 11 | H | LIG | 1 | -2.077 | -0.458 | -0.095 | 1.00 | 0.00 | H |
| HETATM | 12 | H | LIG | 1 | 0.104  | -2.267 | -0.259 | 1.00 | 0.00 | H |
| HETATM | 13 | H | LIG | 1 | 2.584  | -2.321 | -0.009 | 1.00 | 0.00 | H |
| HETATM | 14 | H | LIG | 1 | 3.872  | -0.230 | 0.324  | 1.00 | 0.00 | H |
| HETATM | 15 | H | LIG | 1 | 2.726  | 1.972  | 0.437  | 1.00 | 0.00 | H |
| HETATM | 16 | H | LIG | 1 | -0.038 | 3.230  | 0.328  | 1.00 | 0.00 | H |
| HETATM | 17 | O | HOH | 2 | -3.545 | -1.774 | 0.138  | 1.00 | 0.00 | O |
| HETATM | 18 | H | HOH | 2 | -3.464 | -2.241 | 0.986  | 1.00 | 0.00 | H |
| HETATM | 19 | H | HOH | 2 | -3.502 | -2.470 | -0.538 | 1.00 | 0.00 | H |

**COMPND Indole-N-Cl<sup>-</sup> (lp- $\pi$ )**

AUTHOR GENERATED BY OPEN BABEL 2.2.3

|        |    |    |     |   |        |        |        |      |      |    |
|--------|----|----|-----|---|--------|--------|--------|------|------|----|
| HETATM | 1  | N  | LIG | 1 | -0.752 | 1.277  | -0.733 | 1.00 | 0.00 | N  |
| HETATM | 2  | C  | LIG | 1 | -0.202 | -0.536 | -1.962 | 1.00 | 0.00 | C  |
| HETATM | 3  | C  | LIG | 1 | 2.641  | -0.688 | 0.593  | 1.00 | 0.00 | C  |
| HETATM | 4  | C  | LIG | 1 | 1.106  | 1.179  | 0.974  | 1.00 | 0.00 | C  |
| HETATM | 5  | C  | LIG | 1 | -1.103 | 0.497  | -1.821 | 1.00 | 0.00 | C  |
| HETATM | 6  | C  | LIG | 1 | 0.768  | -0.397 | -0.910 | 1.00 | 0.00 | C  |
| HETATM | 7  | C  | LIG | 1 | 1.917  | -1.111 | -0.522 | 1.00 | 0.00 | C  |
| HETATM | 8  | C  | LIG | 1 | 2.237  | 0.446  | 1.336  | 1.00 | 0.00 | C  |
| HETATM | 9  | C  | LIG | 1 | 0.390  | 0.763  | -0.154 | 1.00 | 0.00 | C  |
| HETATM | 10 | H  | LIG | 1 | -2.025 | 0.691  | -2.351 | 1.00 | 0.00 | H  |
| HETATM | 11 | H  | LIG | 1 | -1.375 | 1.941  | -0.296 | 1.00 | 0.00 | H  |
| HETATM | 12 | H  | LIG | 1 | 0.769  | 2.026  | 1.568  | 1.00 | 0.00 | H  |
| HETATM | 13 | H  | LIG | 1 | 2.804  | 0.738  | 2.218  | 1.00 | 0.00 | H  |
| HETATM | 14 | H  | LIG | 1 | 3.523  | -1.244 | 0.908  | 1.00 | 0.00 | H  |
| HETATM | 15 | H  | LIG | 1 | 2.226  | -1.997 | -1.076 | 1.00 | 0.00 | H  |
| HETATM | 16 | H  | LIG | 1 | -0.239 | -1.314 | -2.715 | 1.00 | 0.00 | H  |
| HETATM | 17 | CL | LIG | 2 | -2.582 | -0.576 | 1.204  | 1.00 | 0.00 | Cl |

**COMPND Uracil-N-water (lp- $\pi$ )**

AUTHOR GENERATED BY OPEN BABEL 2.2.3

|        |    |   |     |   |        |        |        |      |      |   |
|--------|----|---|-----|---|--------|--------|--------|------|------|---|
| HETATM | 1  | N | LIG | 1 | -0.063 | -0.220 | 0.946  | 1.00 | 0.00 | N |
| HETATM | 2  | C | LIG | 1 | -1.352 | -0.009 | 0.388  | 1.00 | 0.00 | C |
| HETATM | 3  | C | LIG | 1 | -1.380 | 1.040  | -0.626 | 1.00 | 0.00 | C |
| HETATM | 4  | C | LIG | 1 | -0.223 | 1.612  | -1.039 | 1.00 | 0.00 | C |
| HETATM | 5  | N | LIG | 1 | 0.996  | 1.255  | -0.504 | 1.00 | 0.00 | N |
| HETATM | 6  | C | LIG | 1 | 1.150  | 0.273  | 0.487  | 1.00 | 0.00 | C |
| HETATM | 7  | O | LIG | 1 | -2.310 | -0.671 | 0.777  | 1.00 | 0.00 | O |
| HETATM | 8  | H | LIG | 1 | -2.335 | 1.309  | -1.060 | 1.00 | 0.00 | H |
| HETATM | 9  | H | LIG | 1 | -0.186 | 2.375  | -1.813 | 1.00 | 0.00 | H |
| HETATM | 10 | H | LIG | 1 | 1.861  | 1.642  | -0.862 | 1.00 | 0.00 | H |
| HETATM | 11 | O | LIG | 1 | 2.246  | -0.082 | 0.900  | 1.00 | 0.00 | O |
| HETATM | 12 | H | LIG | 1 | 0.008  | -0.989 | 1.608  | 1.00 | 0.00 | H |
| HETATM | 13 | O | HOH | 2 | 0.515  | -2.314 | -1.220 | 1.00 | 0.00 | O |
| HETATM | 14 | H | HOH | 2 | 1.312  | -2.824 | -1.002 | 1.00 | 0.00 | H |
| HETATM | 15 | H | HOH | 2 | -0.198 | -2.971 | -1.258 | 1.00 | 0.00 | H |

**COMPND Uracil-M-water (lp- $\pi$ )**

AUTHOR GENERATED BY OPEN BABEL 2.2.3

|        |   |   |     |   |        |        |        |      |      |   |
|--------|---|---|-----|---|--------|--------|--------|------|------|---|
| HETATM | 1 | N | LIG | 1 | 0.599  | -1.171 | -0.064 | 1.00 | 0.00 | N |
| HETATM | 2 | C | LIG | 1 | 1.404  | 0.000  | -0.083 | 1.00 | 0.00 | C |
| HETATM | 3 | C | LIG | 1 | 0.631  | 1.235  | -0.099 | 1.00 | 0.00 | C |
| HETATM | 4 | C | LIG | 1 | -0.721 | 1.190  | -0.001 | 1.00 | 0.00 | C |
| HETATM | 5 | N | LIG | 1 | -1.404 | 0.000  | 0.083  | 1.00 | 0.00 | N |
| HETATM | 6 | C | LIG | 1 | -0.780 | -1.254 | 0.102  | 1.00 | 0.00 | C |
| HETATM | 7 | O | LIG | 1 | 2.630  | -0.095 | -0.083 | 1.00 | 0.00 | O |
| HETATM | 8 | H | LIG | 1 | 1.166  | 2.175  | -0.159 | 1.00 | 0.00 | H |

|        |    |   |     |   |        |        |        |      |      |   |
|--------|----|---|-----|---|--------|--------|--------|------|------|---|
| HETATM | 9  | H | LIG | 1 | -1.338 | 2.084  | 0.025  | 1.00 | 0.00 | H |
| HETATM | 10 | H | LIG | 1 | -2.406 | -0.018 | 0.237  | 1.00 | 0.00 | H |
| HETATM | 11 | O | LIG | 1 | -1.397 | -2.302 | 0.241  | 1.00 | 0.00 | O |
| HETATM | 12 | H | LIG | 1 | 1.097  | -2.058 | -0.043 | 1.00 | 0.00 | H |
| HETATM | 13 | O | HOH | 2 | 0.000  | 0.000  | 3.084  | 1.00 | 0.00 | O |
| HETATM | 14 | H | HOH | 2 | -0.220 | -0.880 | 3.428  | 1.00 | 0.00 | H |
| HETATM | 15 | H | HOH | 2 | 0.894  | 0.165  | 3.424  | 1.00 | 0.00 | H |

COMPND **TCB-CH-water (lp- $\pi$ )**

AUTHOR GENERATED BY OPEN BABEL 2.2.3

|        |    |   |     |   |        |        |        |      |      |   |
|--------|----|---|-----|---|--------|--------|--------|------|------|---|
| HETATM | 1  | C | LIG | 1 | 2.408  | 1.764  | -0.173 | 1.00 | 0.00 | C |
| HETATM | 2  | C | LIG | 1 | 1.205  | 0.997  | -0.260 | 1.00 | 0.00 | C |
| HETATM | 3  | C | LIG | 1 | 2.504  | -1.100 | -0.520 | 1.00 | 0.00 | C |
| HETATM | 4  | C | LIG | 1 | 1.254  | -0.412 | -0.443 | 1.00 | 0.00 | C |
| HETATM | 5  | C | LIG | 1 | -0.036 | 1.640  | -0.152 | 1.00 | 0.00 | C |
| HETATM | 6  | C | LIG | 1 | -1.228 | 0.906  | -0.219 | 1.00 | 0.00 | C |
| HETATM | 7  | C | LIG | 1 | 0.062  | -1.143 | -0.521 | 1.00 | 0.00 | C |
| HETATM | 8  | C | LIG | 1 | -1.178 | -0.503 | -0.401 | 1.00 | 0.00 | C |
| HETATM | 9  | C | LIG | 1 | -2.481 | 1.581  | -0.092 | 1.00 | 0.00 | C |
| HETATM | 10 | C | LIG | 1 | -2.374 | -1.282 | -0.435 | 1.00 | 0.00 | C |
| HETATM | 11 | H | LIG | 1 | -0.073 | 2.715  | -0.011 | 1.00 | 0.00 | H |
| HETATM | 12 | H | LIG | 1 | 0.100  | -2.219 | -0.650 | 1.00 | 0.00 | H |
| HETATM | 13 | N | LIG | 1 | -3.494 | 2.145  | 0.013  | 1.00 | 0.00 | N |
| HETATM | 14 | N | LIG | 1 | 3.380  | 2.401  | -0.101 | 1.00 | 0.00 | N |
| HETATM | 15 | N | LIG | 1 | 3.510  | -1.683 | -0.570 | 1.00 | 0.00 | N |
| HETATM | 16 | N | LIG | 1 | -3.335 | -1.940 | -0.449 | 1.00 | 0.00 | N |
| HETATM | 17 | O | HOH | 2 | 0.108  | -1.467 | 2.538  | 1.00 | 0.00 | O |
| HETATM | 18 | H | HOH | 2 | 0.902  | -1.946 | 2.828  | 1.00 | 0.00 | H |
| HETATM | 19 | H | HOH | 2 | -0.634 | -2.014 | 2.844  | 1.00 | 0.00 | H |

COMPND **TCB-CH-Cl<sup>-</sup> (lp- $\pi$ ) Cl constrained to lie on the normal through C(H)**

|      |    |    |   |   |        |        |        |      |      |    |
|------|----|----|---|---|--------|--------|--------|------|------|----|
| ATOM | 1  | C  | X | 1 | -1.219 | 1.030  | -0.076 | 0.00 | 0.00 | C  |
| ATOM | 2  | C  | X | 1 | -1.222 | -0.297 | -0.579 | 0.00 | 0.00 | C  |
| ATOM | 3  | C  | X | 1 | 0.000  | -0.957 | -0.815 | 0.00 | 0.00 | C  |
| ATOM | 4  | C  | X | 1 | 1.222  | -0.297 | -0.579 | 0.00 | 0.00 | C  |
| ATOM | 5  | C  | X | 1 | 1.219  | 1.030  | -0.076 | 0.00 | 0.00 | C  |
| ATOM | 6  | C  | X | 1 | -0.000 | 1.674  | 0.190  | 0.00 | 0.00 | C  |
| ATOM | 7  | H  | X | 1 | 0.000  | -1.971 | -1.193 | 0.00 | 0.00 | H  |
| ATOM | 8  | H  | X | 1 | -0.000 | 2.684  | 0.585  | 0.00 | 0.00 | H  |
| ATOM | 9  | C  | X | 1 | 2.447  | -0.964 | -0.876 | 0.00 | 0.00 | C  |
| ATOM | 10 | N  | X | 1 | 3.442  | -1.501 | -1.161 | 0.00 | 0.00 | N  |
| ATOM | 11 | C  | X | 1 | 2.439  | 1.729  | 0.171  | 0.00 | 0.00 | C  |
| ATOM | 12 | N  | X | 1 | 3.417  | 2.331  | 0.368  | 0.00 | 0.00 | N  |
| ATOM | 13 | C  | X | 1 | -2.439 | 1.729  | 0.170  | 0.00 | 0.00 | C  |
| ATOM | 14 | N  | X | 1 | -3.417 | 2.331  | 0.367  | 0.00 | 0.00 | N  |
| ATOM | 15 | C  | X | 1 | -2.447 | -0.964 | -0.875 | 0.00 | 0.00 | C  |
| ATOM | 16 | N  | X | 1 | -3.442 | -1.501 | -1.160 | 0.00 | 0.00 | N  |
| ATOM | 17 | Cl | X | 1 | 0.000  | -1.895 | 1.803  | 0.00 | 0.00 | CL |

COMPND **TCB-CH-Cl<sup>-</sup> (lp- $\pi$ ) fully optimized**

|      |    |   |   |   |        |        |        |      |      |   |
|------|----|---|---|---|--------|--------|--------|------|------|---|
| ATOM | 1  | C | X | 1 | -1.217 | 1.053  | -0.063 | 0.00 | 0.00 | C |
| ATOM | 2  | C | X | 1 | -1.224 | -0.289 | -0.518 | 0.00 | 0.00 | C |
| ATOM | 3  | C | X | 1 | 0.000  | -1.003 | -0.623 | 0.00 | 0.00 | C |
| ATOM | 4  | C | X | 1 | 1.224  | -0.288 | -0.518 | 0.00 | 0.00 | C |
| ATOM | 5  | C | X | 1 | 1.217  | 1.053  | -0.063 | 0.00 | 0.00 | C |
| ATOM | 6  | C | X | 1 | -0.000 | 1.706  | 0.198  | 0.00 | 0.00 | C |
| ATOM | 7  | H | X | 1 | 0.000  | -1.996 | -1.047 | 0.00 | 0.00 | H |
| ATOM | 8  | H | X | 1 | -0.000 | 2.729  | 0.556  | 0.00 | 0.00 | H |
| ATOM | 9  | C | X | 1 | 2.446  | -0.941 | -0.848 | 0.00 | 0.00 | C |
| ATOM | 10 | N | X | 1 | 3.440  | -1.464 | -1.159 | 0.00 | 0.00 | N |
| ATOM | 11 | C | X | 1 | 2.437  | 1.774  | 0.121  | 0.00 | 0.00 | C |

|      |    |    |   |   |        |        |        |      |      |    |
|------|----|----|---|---|--------|--------|--------|------|------|----|
| ATOM | 12 | N  | X | 1 | 3.412  | 2.395  | 0.273  | 0.00 | 0.00 | N  |
| ATOM | 13 | C  | X | 1 | -2.437 | 1.775  | 0.120  | 0.00 | 0.00 | C  |
| ATOM | 14 | N  | X | 1 | -3.412 | 2.395  | 0.271  | 0.00 | 0.00 | N  |
| ATOM | 15 | C  | X | 1 | -2.446 | -0.941 | -0.847 | 0.00 | 0.00 | C  |
| ATOM | 16 | N  | X | 1 | -3.441 | -1.465 | -1.158 | 0.00 | 0.00 | N  |
| ATOM | 17 | Cl | X | 1 | 0.000  | -2.304 | 1.568  | 0.00 | 0.00 | Cl |

END
